# Supplementary material
Source: MDPI journal article supplement (https://www.mdpi.com/2073-4433/13/9/1518)
Supplement: s1 [file s1 › atmosphere-1869763-supplementary.pdf]

### Supplementary Materials:

**Figure S1.** Importance of the variables for the approach-1 algorithm

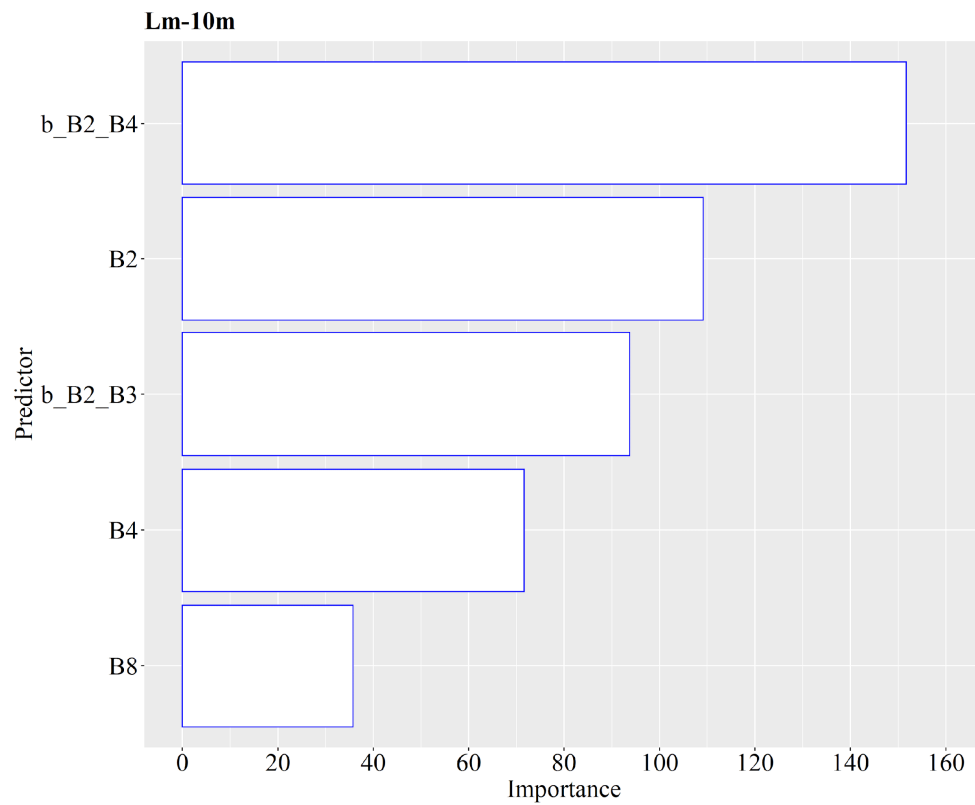

**Figure S2.** Importance of the variables for the approach-1 Cubist algorithm

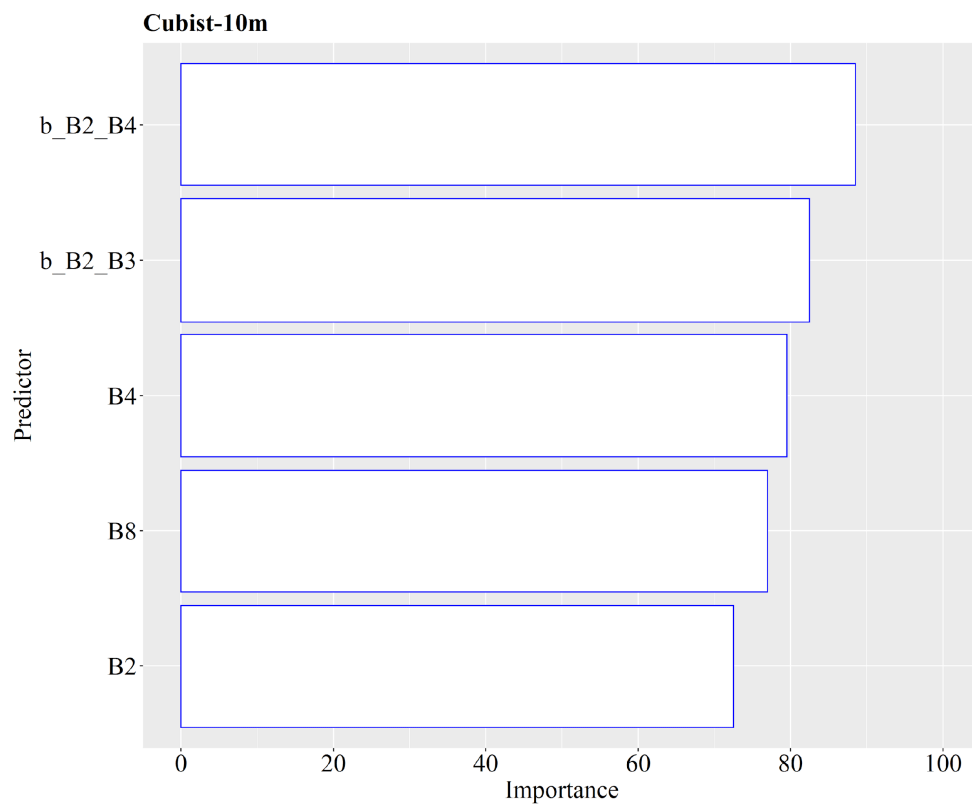

**Figure S3.** Importance of the variables for the approach-1 XgbLinear algorithm

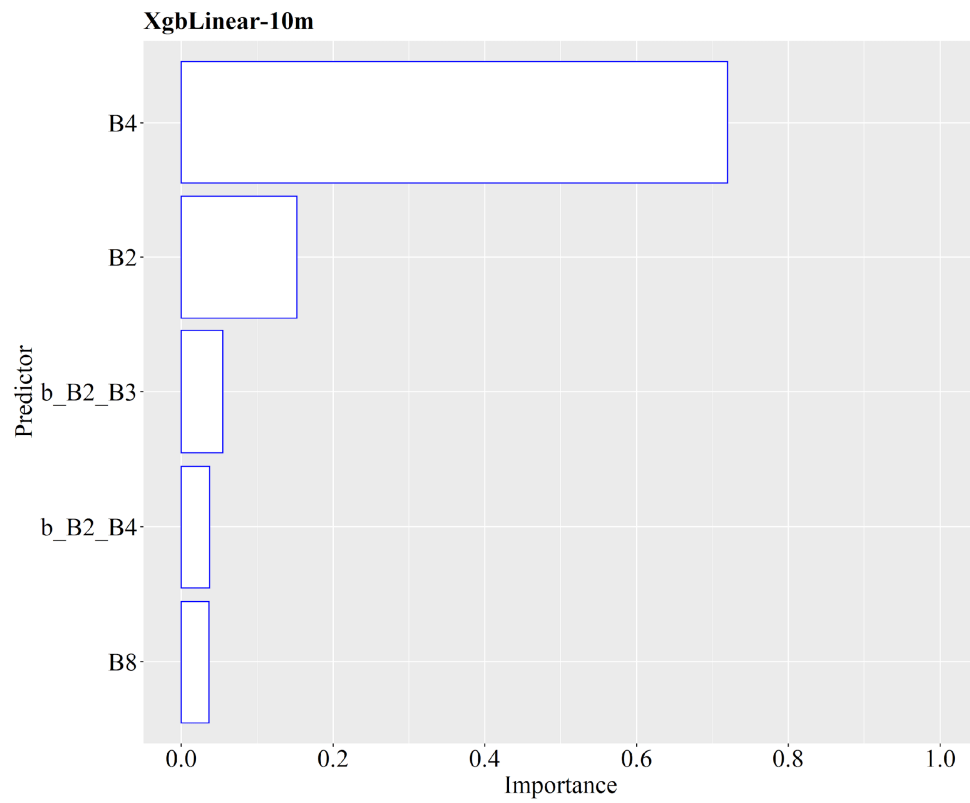

**Figure S4.** Importance of the variables for the approach-1 XgbTree algorithm

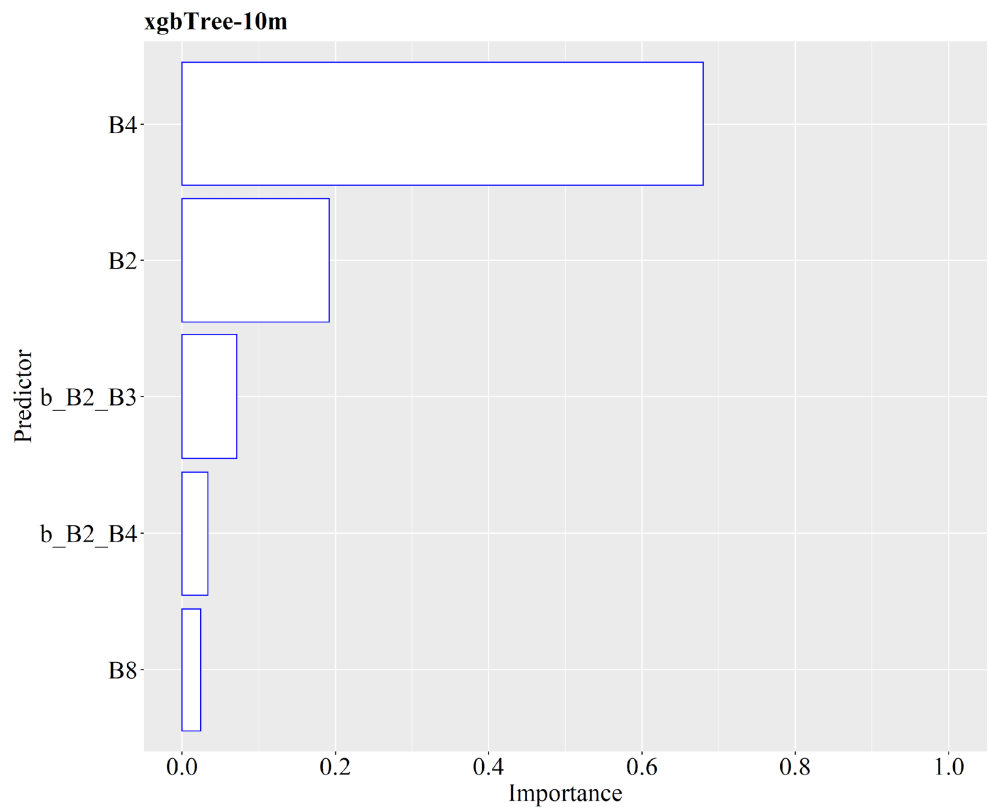

**Figure S5.** Importance of the variables for the approach-2 LM algorithm

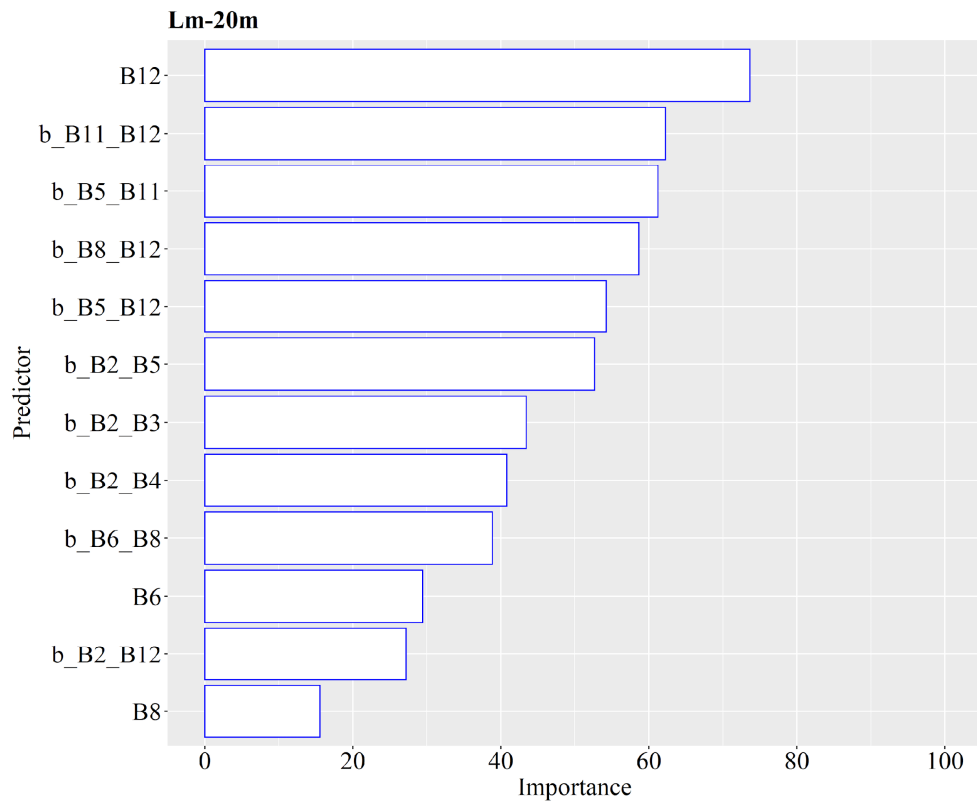

**Figure S6.** Importance of the variables for the approach-2 Cubist algorithm

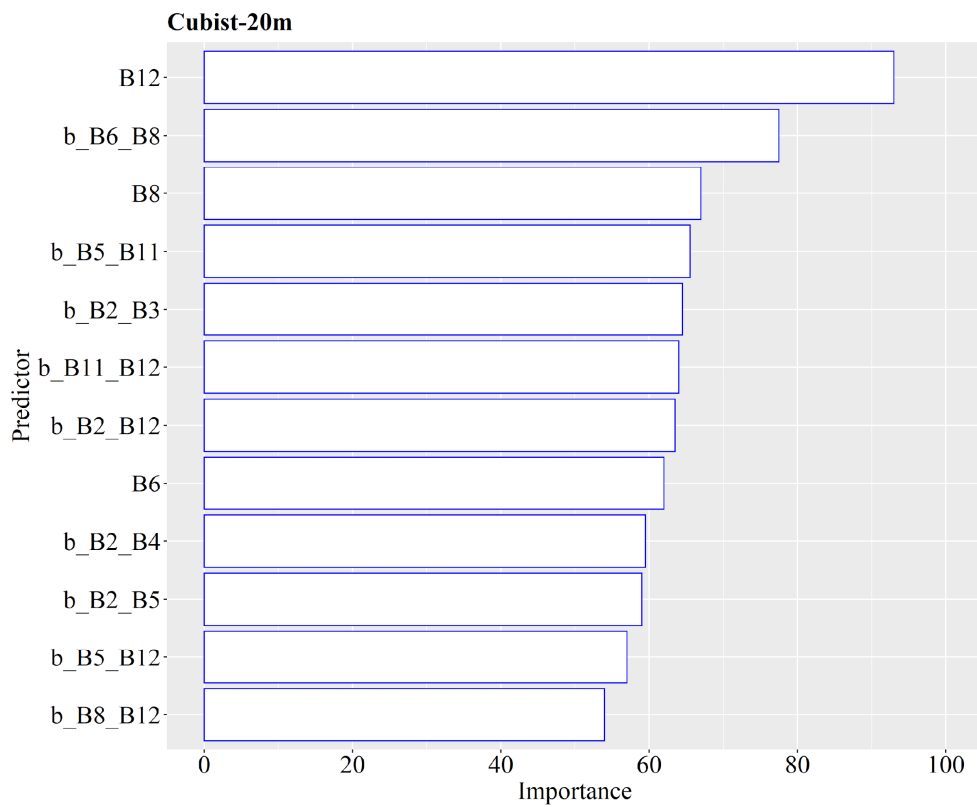

**Figure S7.** Importance of the variables for the approach-2 XgbLinear algorithm

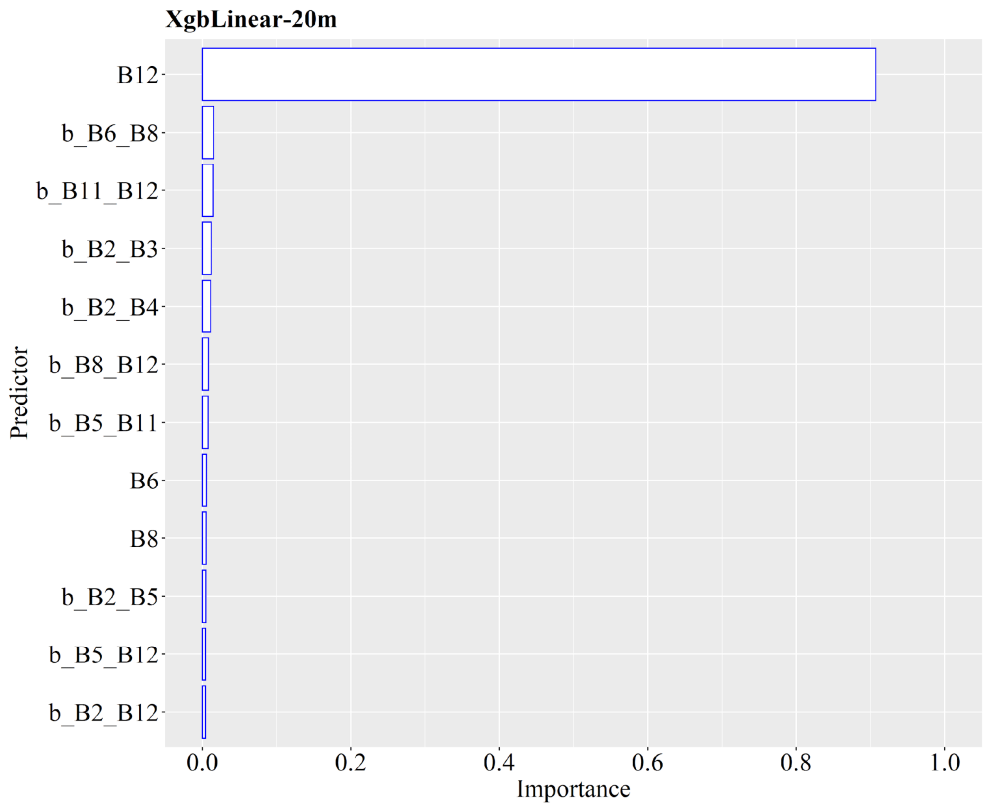

**Figure S8.** Importance of the variables for the approach-2 XgbTree algorithm

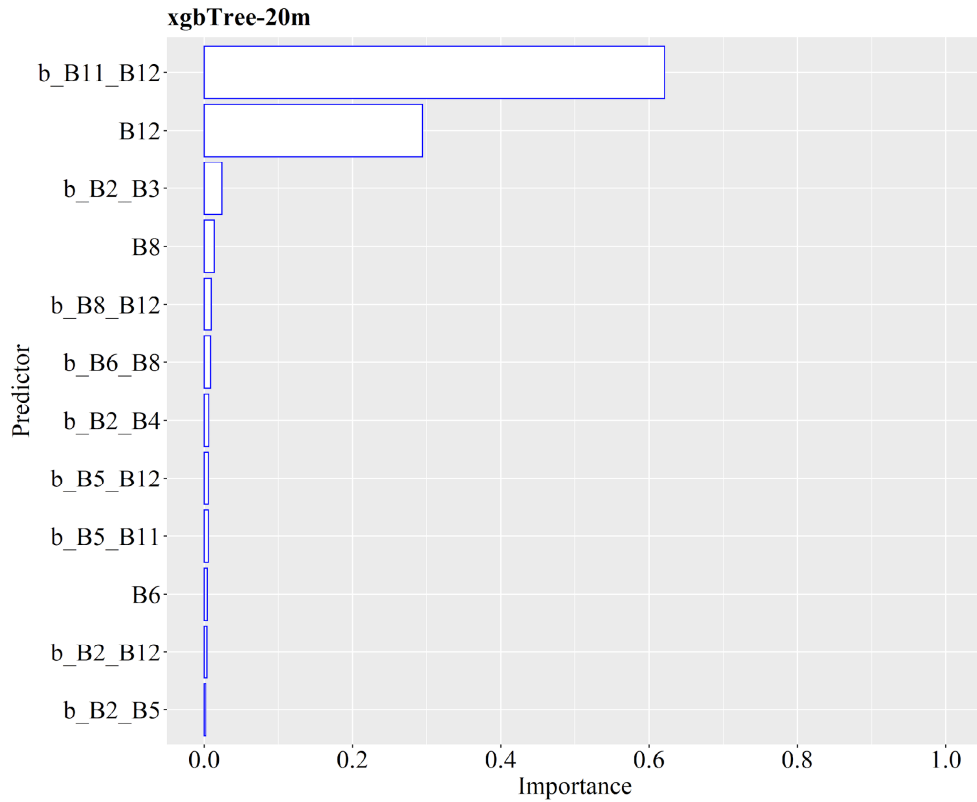

**Table S1:** List of abbreviations

| Abbreviations                                                                        |
|--------------------------------------------------------------------------------------|
| ET <sub>a</sub> = Actual Evapotranspiration                                          |
| ET <sub>ints</sub> = Instantaneous Evapotranspiration                                |
| ET <sub>o</sub> = Reference Potential Evapotranspiration of the Grass                |
| ET <sub>r</sub> = Reference Potential Evapotranspiration of the Afalfa               |
| ET <sub>rF</sub> = Evapotranspiration Fraction                                       |
| METRIC = Mapping Evapotranspiration at High Resolution with Internalized Calibration |
| ML = Machine Learning                                                                |
| MSI = MultiSpectral Instrument                                                       |
| OLI = Operational Land Imager                                                        |
| R <sup>2</sup> = Coefficient of Determination                                        |
| RMSE = Root Mean Squared Error                                                       |
| MAE = Mean Absolute Error                                                            |
| MBE = Mean Bias Error                                                                |
| SAFER = Simple Algorithm for Evapotranspiration Retrieving                           |
| SEBAL = Surface Energy Balance Algorithm for Land                                    |
| TIRS = Thermal Infrared Sensor                                                       |
| P = Precipitation                                                                    |
| T <sub>mean</sub> = Mean Air Temperature                                             |
| T <sub>max</sub> = Maximum Air Temperature                                           |
| T <sub>min</sub> = Minimum Air Temperature                                           |
| μm = Micrometer                                                                      |
| m = Meter                                                                            |
| K <sub>c</sub> = Crop Coefficient                                                    |
| LE = Latent Energy                                                                   |
| ρ <sub>w</sub> = Density of Water                                                    |
| λ = Latent Heat of Vaporization                                                      |

Ts = Surface Temperature  
Rn = Net Radiation  
G = Sensible Flux of Heat Transferred to the Ground  
H = Sensible Flux of Heat Convected to Air  
Rs↓ = Input of Shortwave Radiation  
 $\alpha$  = Surface Albedo  
RL↓ = Input of Long Waves  
RL↑ = Output of Long Waves  
 $\epsilon_0$  = Surface Thermal Emissivity  
LAI = Leaf Area Index  
 $\rho_{air}$  = Air Density  
Cp = Specific Heat of Air at Constant Pressure  
dT = Temperature Difference Between Two Heights  
 $r_{ah}$  = Aerodynamic Drag  
qB = Reflectance of Blue  
qG = Reflectance of Green  
qR = Reflectance of Red  
qNIR = Reflectance of Near-Infrared  
qRe = Reflectance of Red Edge  
qSWIR = Reflectance of Shortwave Infrared  
NRPB = Normalized Ratio Procedure Between Bands  
LM = Linear Regression  
Xgblinear = eXtreme Gradient Boosting-linear method  
XgbTree = eXtreme Gradient Boosting-tree method  
DAE = Days After Emergency  
FAO = Food and Agriculture Organization

---
